# Supplementary material
Source: PubMed Central journal article supplement (PMC10877446)
Supplement: NIHMS1965120-supplement-Supplementary_material.pdf [file NIHMS1965120-supplement-Supplementary_material.pdf]

**DNA Methylation of TXNIP Independently Associated with Inflammation and Diabetes**

**Mellitus in Twins**

Yijin Xiang MPH<sup>1†</sup>, Zeyuang Wang MPH<sup>1†</sup>, Qin Hui PhD<sup>1</sup>, Marta Gwinn MD<sup>1</sup>,

Viola Vaccarino MD PhD<sup>1</sup>, Yan V. Sun PhD<sup>1,2</sup>

**Supplementary Table S1.** Association of methylation at *TXNIP*-cg19693031 with log-transformed inflammatory biomarkers among monozygotic twins. The associations were examined in twin-specific models using individual deviation from the twin-pair average (within-pair effect), and twins-as-individual models.

| Phenotype                   | N   | Within-Pair Methylation |                       |                             | Individual Methylation |                       |                             |
|-----------------------------|-----|-------------------------|-----------------------|-----------------------------|------------------------|-----------------------|-----------------------------|
|                             |     | Beta                    | SE                    | P-value*                    | Beta                   | SE                    | P-value*                    |
| <b>Log - transformed</b>    |     |                         |                       |                             |                        |                       |                             |
| ICAM-1 (ng/ml)              | 215 | -0.0285                 | 6.36×10 <sup>-3</sup> | <b>2.12×10<sup>-5</sup></b> | -0.0183                | 4.35×10 <sup>-3</sup> | <b>5.94×10<sup>-5</sup></b> |
| VCAM-1 (ng/ml)              | 215 | -0.0240                 | 8.92×10 <sup>-3</sup> | <b>8.42×10<sup>-3</sup></b> | -0.0223                | 5.51×10 <sup>-3</sup> | <b>1.03×10<sup>-4</sup></b> |
| MMP-2 (ng/ml)               | 215 | -0.0129                 | 4.57×10 <sup>-3</sup> | <b>5.84×10<sup>-3</sup></b> | -0.0116                | 2.88×10 <sup>-3</sup> | <b>1.07×10<sup>-4</sup></b> |
| P-selectin (ng/ml)          | 215 | -0.0168                 | 6.56×10 <sup>-3</sup> | 0.0119                      | -0.0102                | 4.82×10 <sup>-3</sup> | 0.0378                      |
| IL-6 (pg/mL)                | 212 | 6.10×10 <sup>-3</sup>   | 0.0196                | 0.756                       | 9.19×10 <sup>-4</sup>  | 0.0114                | 0.936                       |
| High-sensitivity CRP (mg/L) | 214 | -1.25×10 <sup>-3</sup>  | 0.0318                | 0.969                       | 3.99×10 <sup>-3</sup>  | 0.0167                | 0.811                       |
| sRAGE (pg/mL)               | 212 | -0.0115                 | 9.66×10 <sup>-3</sup> | 0.239                       | -0.0137                | 6.26×10 <sup>-3</sup> | 0.0312                      |
| Fibrinogen (mg/dL)          | 198 | -4.68×10 <sup>-3</sup>  | 6.51×10 <sup>-3</sup> | 0.474                       | 1.63×10 <sup>-3</sup>  | 3.90×10 <sup>-3</sup> | 0.678                       |
| MMP-9 (ng/ml)               | 215 | 0.0121                  | 0.0145                | 0.406                       | -2.99×10 <sup>-3</sup> | 8.24×10 <sup>-3</sup> | 0.717                       |

\* Bonferroni correction for multiple testing was used (p-value <0.005).

P-value are calculated from linear mixed models with log transformed inflammatory biomarkers as the dependent variable.

The analysis for each inflammatory biomarker is adjusted for BMI, current smoking status, age and proportions of PBL subtypes (B cells, granulocytes, monocytes, NK cells, and T cells).

Phenotypes are displayed in the same order as in the table 2.

The effect size is based on 0.01 units (1%) difference in DNA methylation.
